# Supplementary material
Source: Springer Nature journal article supplement (https://www.springermedizin.de/resource/supplementary/12936_2007_574_MOESM4_ESM.pdf/9548322)

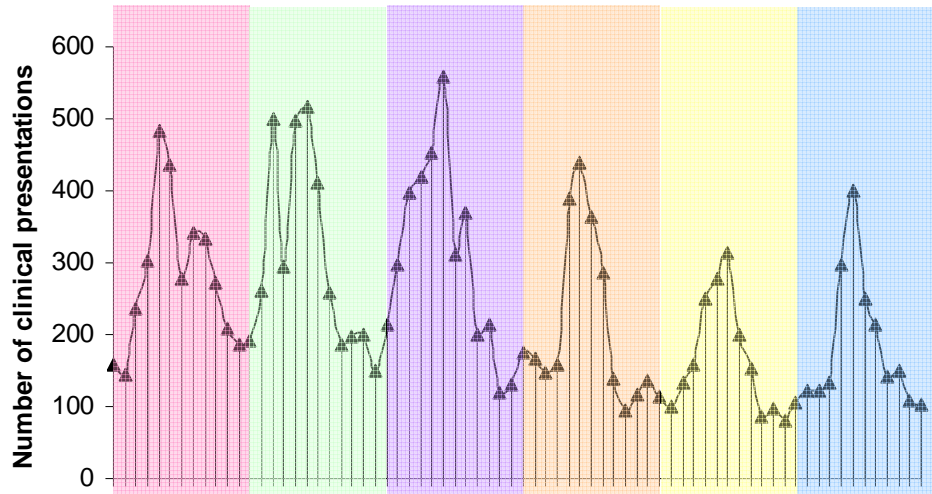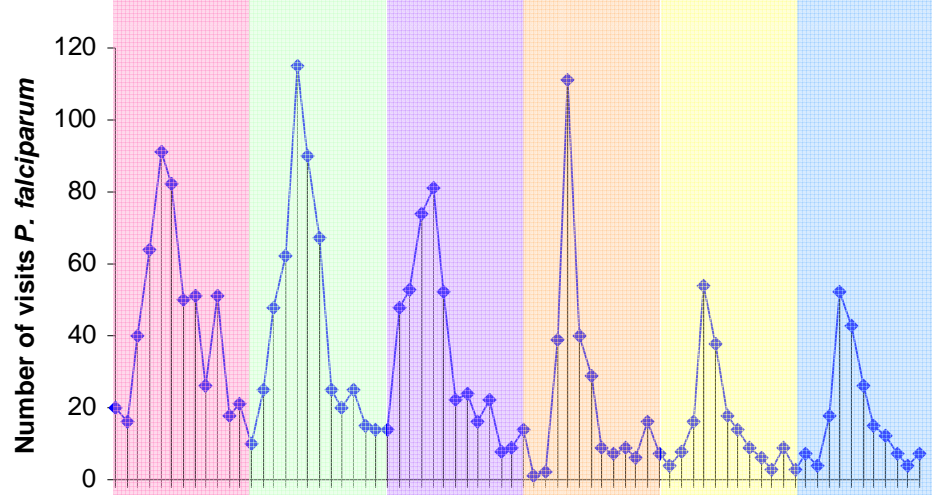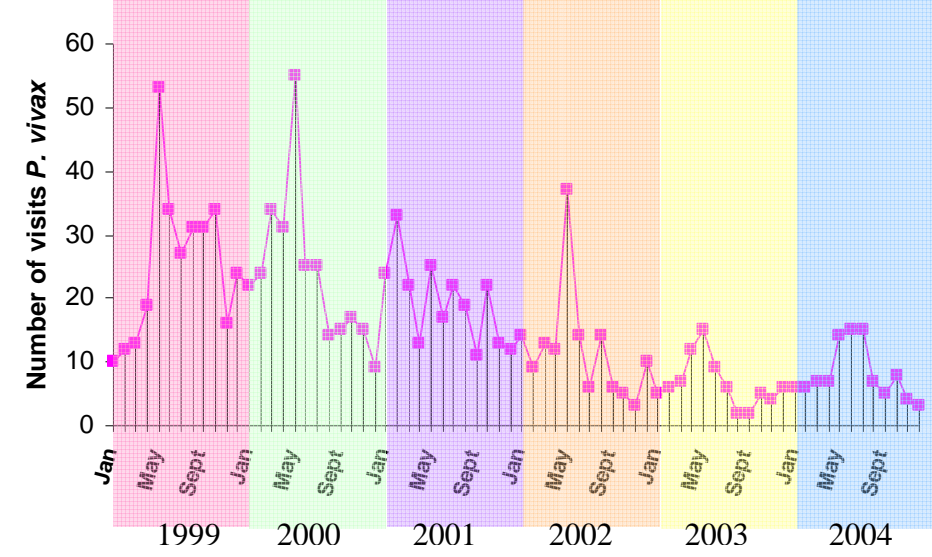

Supplement: MOESM4 [file 9548322]
